# Supplementary material
Source: publisher site journal article supplement (https://www.dovepress.com/article/339752)
Supplement: Supplementary file 1 [file get_supplementary_file.php]

**Supplementary materials**

**Table S1: RE-AIM framework to evaluate implementation of the MURTI**

| **Metric** | **Dimension** | **Study measure** | **Data source** |
| --- | --- | --- | --- |
| Reach | - Proportion of junior faculty that participated in the MURTI fellowship - Proportion of junior faculty that participated in the MURTI courses | - percent of junior faculty segregated by course attended, gender, training, department, and faculty | - RA review program reports - Data from course registration sheets |
| Effectiveness | Success rate if MURTI fellowship was implemented as intended | - percent of junior faculty submitted grants applications - percent of junior faculty awarded extramural grants - percent of junior faculty reporting manuscript submission - percent of junior faculty with publications acknowledging MURTI support - percent of conference presentations per MURTI fellow segregated by national and international | - RA review program reports - RA review of grants records - RA review PubMed database |

**Table S2: Exploring** **Organizational theory of implementation effectiveness**

| **CONSTRUCT** | **QUESTIONS** | **MEASURE** |
| --- | --- | --- |
| Organizational readiness for change | - What are your perceptions about whether training program was acceptable or not acceptable? - What are the collective actions that helped you go through the training program? | Level of change commitment  Level of change efficacy |
| Implementation policies and procedures | - What implementation policies and procedures were in place to ensure successful implementation of the training program? - Tell me what you think about the policies and procedures to foster change commitment at MUST | Flexibility of policies and procedures |
| Implementation climate | - What are your thoughts about whether the research training program is needed, important, beneficial, or worthwhile | Positive or negative |
